# Supplementary material
Source: Royal Society of Chemistry journal article supplement (doi:10.1039/d6ma00389c)
Supplement: d6ma00389c1.pdf [file d6ma00389c1.pdf]

## Supporting Information

### **From Spin Coating to Zone Casting: Process Dependence and Challenges in Scaling Quasi-2D Perovskite Films**

Akshay Govardhan,<sup>1,2†</sup> L. Andrés Guerrero-León,<sup>1,2†</sup> Vladimir Shilovskih,<sup>1,2</sup> Fabian Paulus,<sup>1</sup> Boris Rivkin,<sup>1,2</sup> and Yana Vaynzof<sup>1,2\*</sup>

Leibniz Institute for Solid State and Materials Research Dresden, Helmholtzstr. 20, 01069 Dresden, Germany

Chair for Emerging Electronic Technologies, Technical University of Dresden, Nöthnitzer Str. 61, 01187 Dresden, Germany

† These authors contributed equally to this work.

Corresponding Author

\*Yana Vaynzof, e-mail: [y.vaynzof@ifw-dresden.de](mailto:y.vaynzof@ifw-dresden.de)

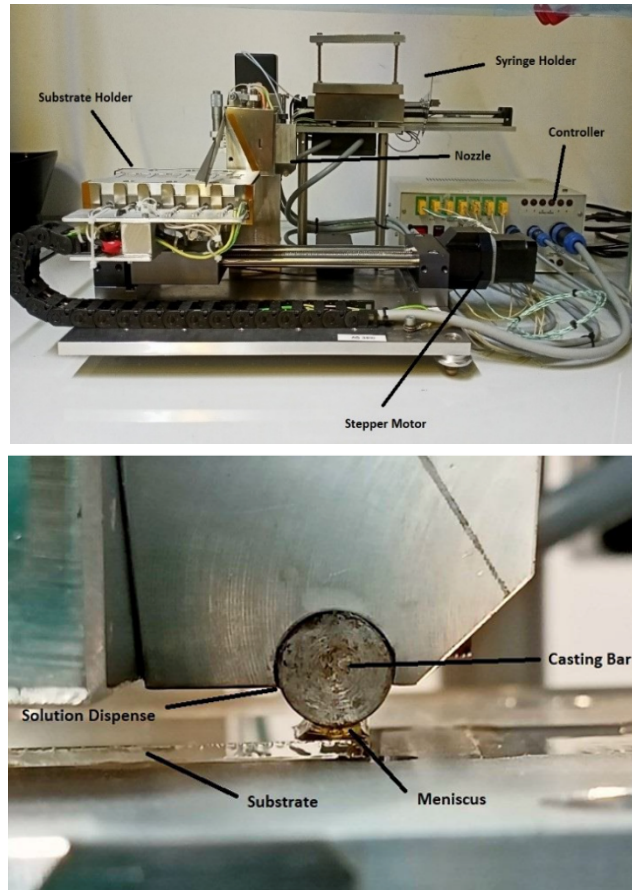

**Figure S1.** Photographs of the zone-casting instrument (up) and the formation of the meniscus between the cylindrical bar and the substrate (down).

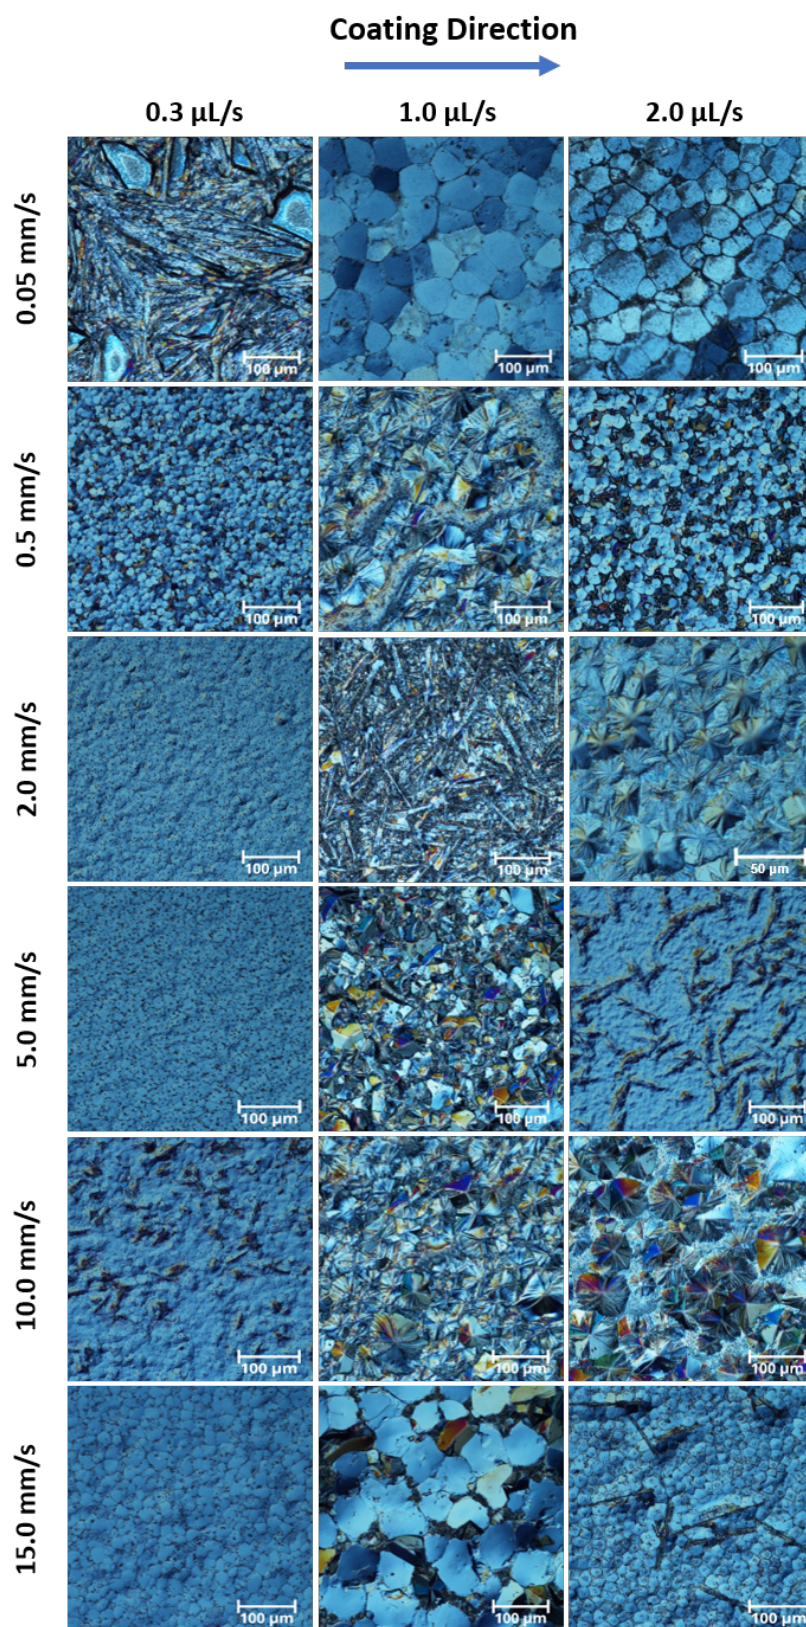

**Figure S2.** Polarized optical microscopy images of the zone-casted thin films under different injection rates (horizontal axis) and casting speeds (vertical axis). The films were cast over glass substrates. The films were cast using a 9:1 DMF:DMSO solvent mixture and solution-substrate temperature of 60 °C

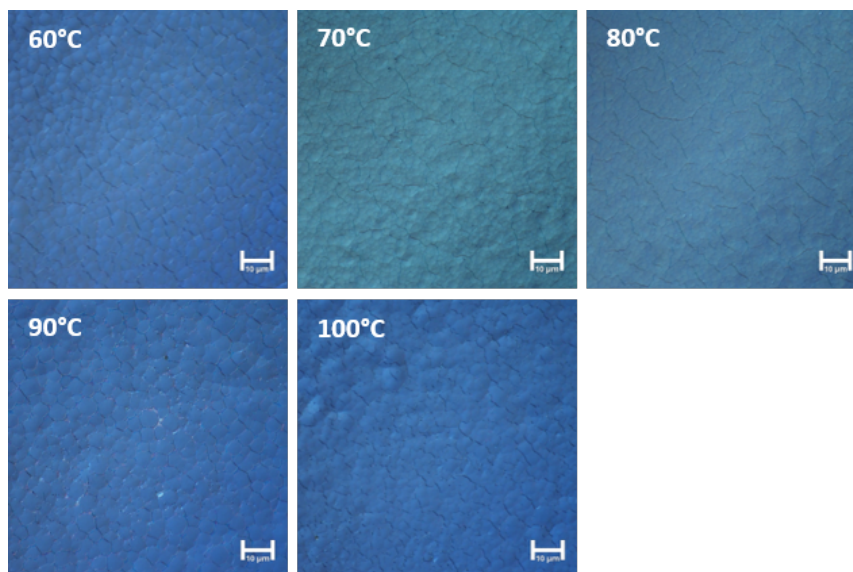

**Figure S3.** Polarized optical microscopy images of the zone-casted thin film under optimized conditions (nozzle height= 1mm, injection rate=  $0.3 \mu\text{L s}^{-1}$ , casting speed=  $5 \text{ mm s}^{-1}$ ). The films were cast using a 9:1 DMF:DMSO solvent mixture and solution-substrate from 60 to 100° C.

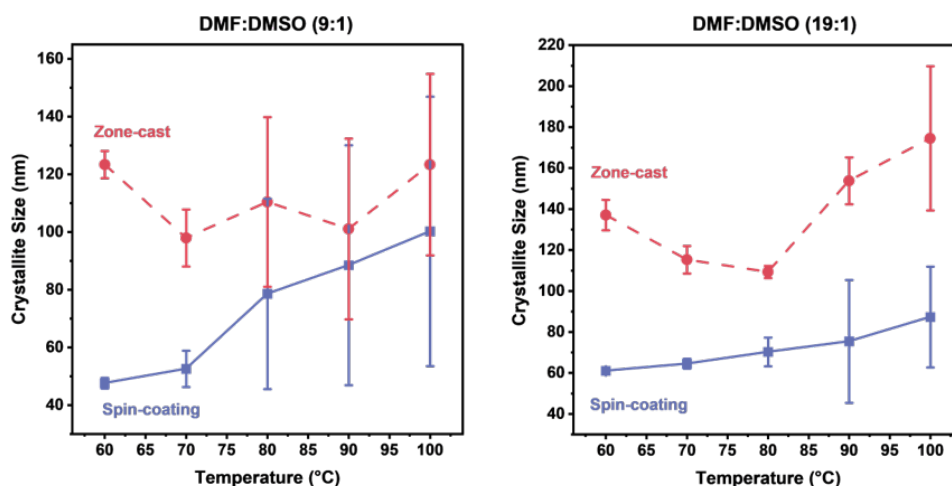

**Figure S4.** Evolution of the crystallite size estimated from the XRD peak broadening analysis using the FWHM values of the main diffraction reflections for the films processed at 60 – 100° C solution-substrate temperatures and 9:1 and 19:1 DMF:DMSO solvent ratios. The crystallite sizes were calculated from the diffraction peaks using the Scherrer equation, comparing spin-coated (straight lines) and zone-cast (dashed lines) films.

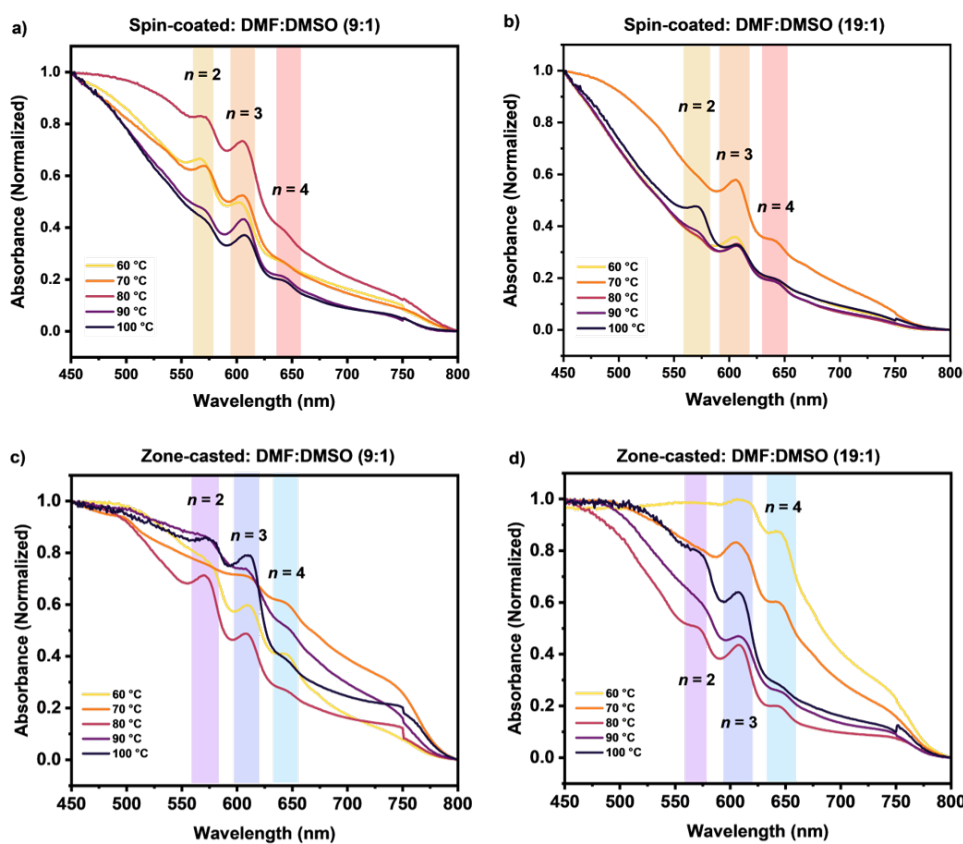

**Figure S5.** Normalized UV-vis spectra of films fabricated at different solution-substrate temperatures by spin-coating and zone-casting using a,c) 9:1 and b,d) 19:1 DMF:DMSO ratios.

## Spin-coated

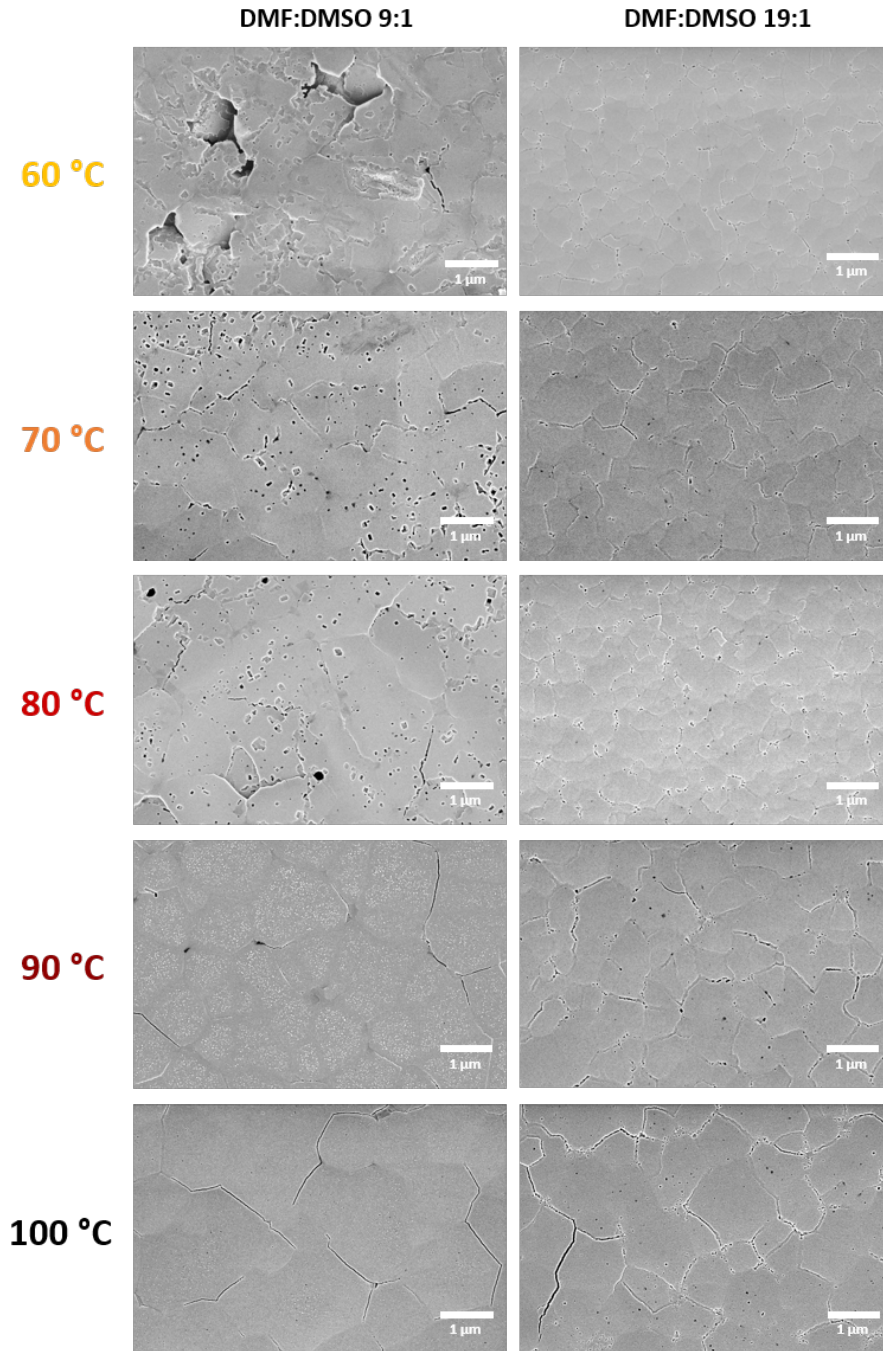

**Figure S6.** SEM images of thin films prepared by spin-coating from precursor solutions with 9:1 and 19:1 DMF:DMSO volume ratios (Magnification = 50.00K x, detector = InLens) with visible perovskite grains and boundaries.

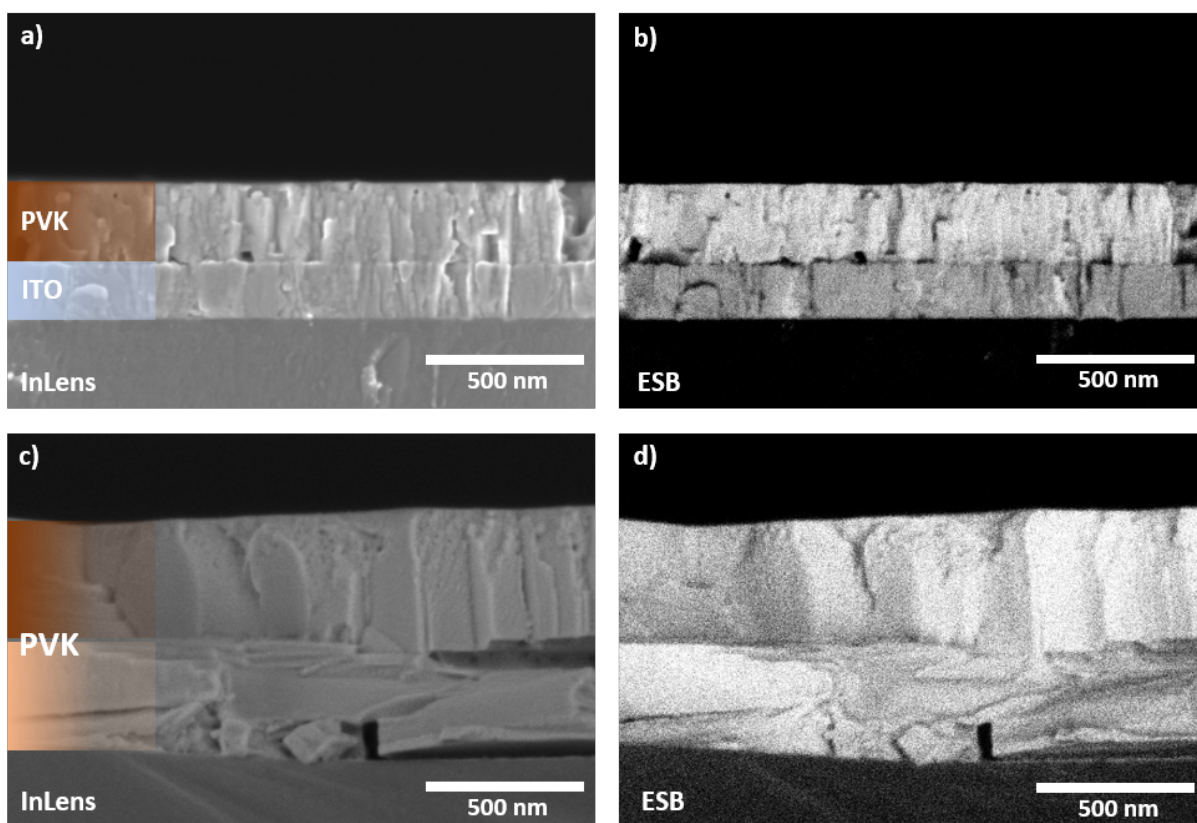

**Figure S7.** Cross-sectional SEM micrographs of quasi-2D perovskite thin films fabricated by spin-coating (a, b) and zone-casting (c, d), captured under different detectors. The images reveal that the zone-cast films exhibit visible phase segregation. In contrast, spin-coated films display an intermixed phase distribution throughout the layer.

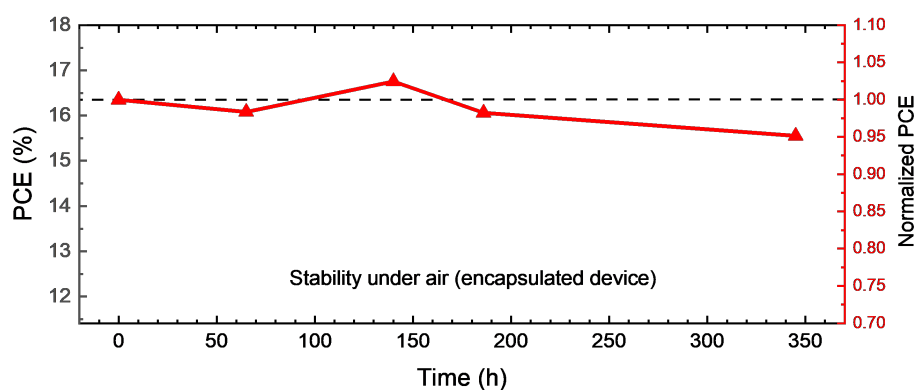

**Figure S8.** Stability of the champion solar cell fabricated under 19:1 DMSO and solution-substrate temperature of 60°C, and kept under air for over 350 h. The data shows the solar devices remain 95% of its initial performance.
